# Supplementary material
Source: publisher site journal article supplement (https://www.dovepress.com/get_supplementary_file.php?f=supplementary_file_11_51969.pdf)
Supplement: Supplementary file 1 [file get_supplementary_file.php]

**Table S11. 21 target genes of three miRNAs that can directly/indirectly interact with p53**

| Gene Name | RefSeq       | Description                                             | TargetScan Context Score | Interaction with p53 |
|-----------|--------------|---------------------------------------------------------|--------------------------|----------------------|
| JMY       | NM_152405    | junction mediating and regulatory protein, p53 cofactor | -0.07                    | direct               |
| KLLN      | NM_001126049 | killin, p53-regulated DNA replication inhibitor         | -0.11                    | direct               |
| MDM2      | NM_002392    | Mdm2 p53 binding protein homolog (mouse)                | -0.08                    | direct               |
| MDM4      | NM_001204171 | Mdm4 p53 binding protein homolog (mouse)                | -0.15                    | direct               |
| PDRG1     | NM_030815    | p53 and DNA-damage regulated 1                          | -0.18                    | direct               |
| RRM2B     | NM_001172477 | ribonucleotide reductase M2 B (TP53 inducible)          | -0.02                    | direct               |
| TP53      | NM_000546    | tumor protein p53                                       | -0.18                    | direct               |
| TP53I11   | NM_001076787 | tumor protein p53 inducible protein 11                  | -0.11                    | direct               |
| TP53INP1  | NM_001135733 | tumor protein p53 inducible nuclear protein 1           | -0.43                    | direct               |
| TP53INP2  | NM_021202    | tumor protein p53 inducible nuclear protein 2           | > -0.01                  | direct               |
| TP53RK    | NM_033550    | TP53 regulating kinase                                  | -0.04                    | indirect             |
| STK11     | NM_000455    | serine/threonine kinase 11                              | -1.27                    | indirect             |
| FKBP8     | NM_012181    | FK506 binding protein 8, 38kDa                          | -1.11                    | indirect             |
| ARAF      | NM_001654    | v-raf murine sarcoma 3611 viral oncogene homolog        | -1.1                     | indirect             |
| NRARP     | NM_001004354 | NOTCH-regulated ankyrin repeat protein                  | -1                       | indirect             |
| EEF1A2    | NM_001958    | eukaryotic translation elongation factor 1 alpha 2      | -0.86                    | indirect             |
| EPHA2     | NM_004431    | EPH receptor A2                                         | -0.86                    | indirect             |
| DPP9      | NM_139159    | dipeptidyl-peptidase 9                                  | -0.85                    | indirect             |
| RAB11B    | NM_004218    | RAB11B, member RAS oncogene family                      | -0.82                    | indirect             |
| NFIX      | NM_002501    | nuclear factor I/X (CCAAT-binding transcription factor) | -1.32                    | indirect             |
| TMEM143   | NM_018273    | transmembrane protein 143                               | -0.65                    | indirect             |
